# Supplementary material for: Sputum from patients with primary ciliary dyskinesia contains high numbers of dysfunctional neutrophils and inhibits efferocytosis
Source: PubMed Central journal article supplement (PMC9758951; doi:10.1186/s12931-022-02280-7), 2022-12-17

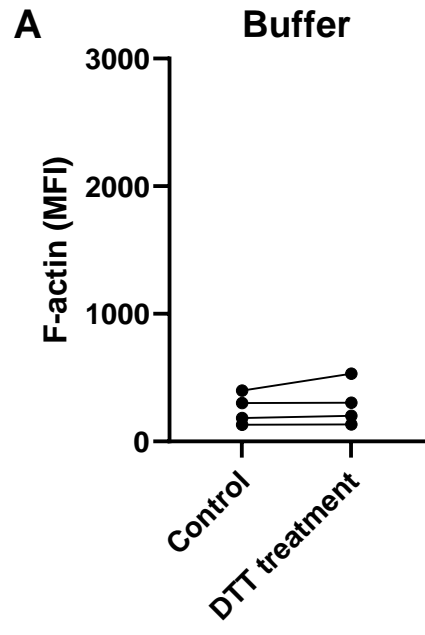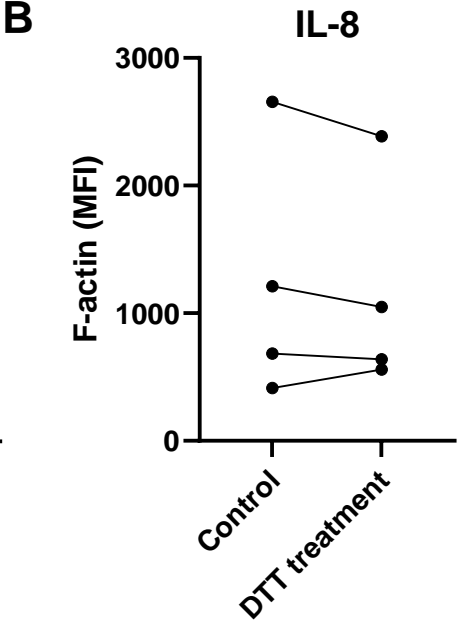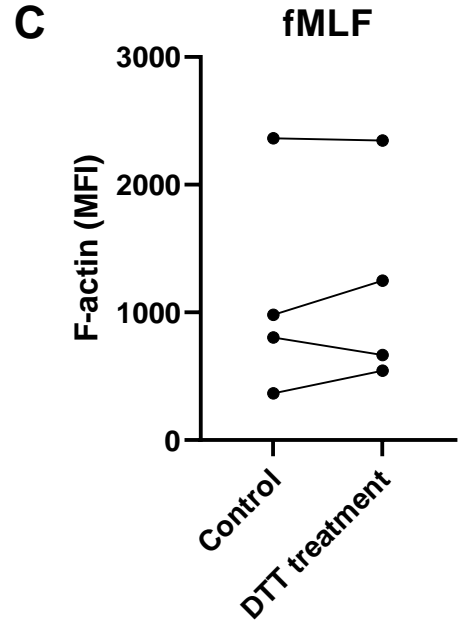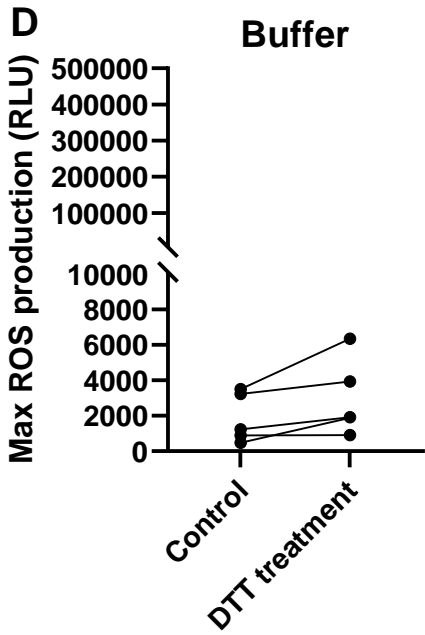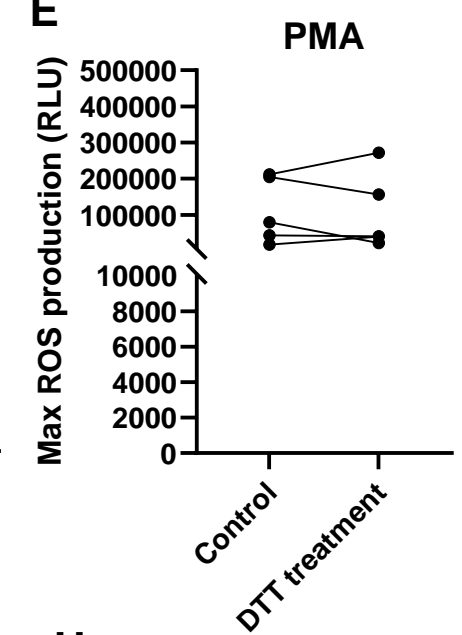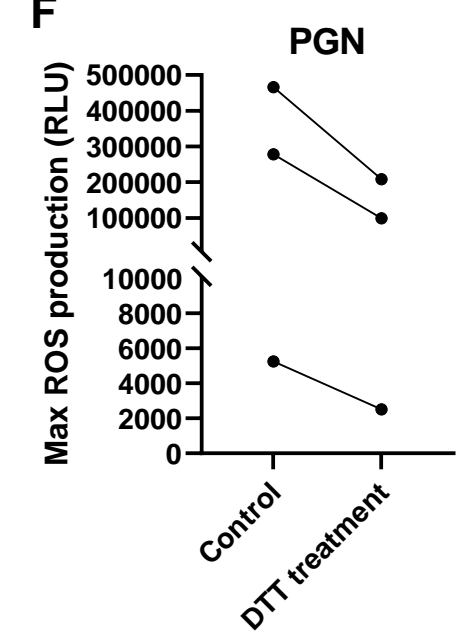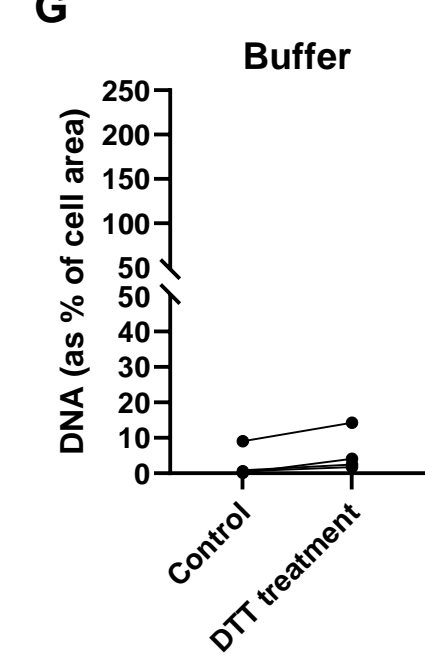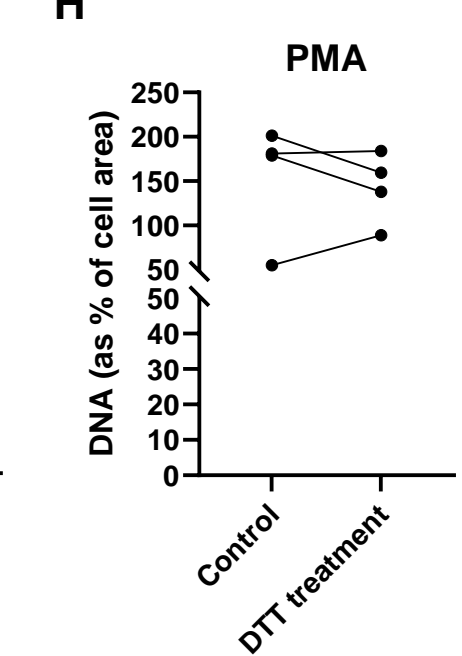

Supplement: 12931_2022_2280_MOESM2_ESM.pdf [file 12931_2022_2280_MOESM2_ESM.pdf]
